# Supplementary material for: Purinoreceptors and ectonucleotidases control ATP-induced calcium waveforms and calcium-dependent responses in microglia: Roles of P2 receptors and CD39 in ATP-stimulated microglia
Source: PubMed Central journal article supplement (PMC9868579; doi:10.3389/fphys.2022.1037417), 2023-01-09
Supplement: DataSheet1.pdf [file DataSheet1.pdf]

## S Supplement

### S.1 Pathway Summary and References

Table S1: Reactions used in the computational microglia model

| Rxn No. | Rxn                                                       | Cell       | Reference |
|---------|-----------------------------------------------------------|------------|-----------|
| 1       | $P2Y \Rightarrow IP_3 \Rightarrow [Ca^{2+}]_i$            | heptaocyte | [6, 7]    |
| 2       | $P2X4 \Rightarrow [Ca^{2+}]_i$                            | microglia  | [28, 10]  |
| 3       | $P2X7 \Rightarrow [Ca^{2+}]_i$                            | microglia  | [16, 3]   |
| 4       | $[Ca^{2+}]_e \Rightarrow [Ca^{2+}]_i$ (leak)              |            | Fit       |
| 5       | $NCX \Rightarrow [Ca^{2+}]_e$                             | microglia  | [25]      |
| 6       | $[Ca^{2+}]_i \Rightarrow$ Buffers                         |            | Fit       |
| 7       | $[Ca^{2+}]_i \Rightarrow CaM \Rightarrow CN$              | Cardiac    | [11, 2]   |
| 8       | $[Ca^{2+}]_i \Rightarrow SERCA$                           | Cardiac    | [25]      |
| 9       | $[Ca^{2+}]_{ER} \Rightarrow [Ca^{2+}]_i$ (leak)           |            | Fit       |
| 10      | $[Ca^{2+}]_{ER} \Rightarrow$ Calreticulin (Calsequestrin) | astrocytes | [25]      |
| 11a     | $[Ca^{2+}]_i \Rightarrow$ p-p38                           | microglia  | [29]      |
| 11b     | p-p38 $\Rightarrow$ $TNF\alpha$                           | microglia  | [13]      |
| 12a     | $CN \Rightarrow$ NFAT                                     | microglia  | [32, 5]   |
| 12b     | NFAT cycle                                                | myocyte    | [5]       |
| 12c     | $NFAT \Rightarrow$ $TNF\alpha$                            | microglia  | [20]      |
| 13      | $TNF\alpha$ Production                                    | microglia  | Fit       |
| 14      | Activation of $P2X7 \Rightarrow$ $TNF\alpha$ release      | microglia  | [1]       |
| 15      | $P2Y12 \Rightarrow G_{i/o}$                               | microglia  | [15, 23]  |
| 16,17   | $G_{i/o} \Rightarrow$ PI3K $\Rightarrow$ pAkt             | microglia  | [23, 8]   |
| 18      | pAkt + $[Ca^{2+}]_i \Rightarrow$ Migration                | microglia  | [23]      |
| 19      | NTPDase of ATP                                            | COS-7      | [18, 24]  |

## S.2 Mathematical Models and Parameters

Table S2 displays the physical constants used for the model.

Table S2: General Parameters

| Parameters      | Values                | Units                               |
|-----------------|-----------------------|-------------------------------------|
| T               | 310                   | K                                   |
| $V_{pot}$       | $-5.0 \times 10^{-2}$ | V                                   |
| F               | 96485                 | $\frac{C}{mol}$                     |
| R               | 8.314                 | $\frac{mol \times K}{mol \times K}$ |
| $r_{microglia}$ | 3.68                  | $\mu m$                             |
| $[Ca^{2+}]_e$   | 2                     | mM                                  |
| $[Na^+]_e$      | 145                   | mM                                  |
| $[Na^+]_i$      | 8                     | mM                                  |

### S.2.1 GPCR-mediated $Ca^{2+}$ transients

**Equations** Our model is based on the formulations from Cuthbertson-Chay and Young-Kaizer [6, 7]. The Cuthbertson-Chay model (denoted as CC) describes the G-protein coupled receptor signaling pathway culminating in the production of  $\dagger$  and  $IP_3$  from PIP2. The Young-Kaizer model (denoted as YK) describes  $IP_3$ -dependent  $Ca^{2+}$  release from the ER via the . The CC model equations are as follows:

$$\begin{aligned}
 d_{cc} &= \frac{[DAG]_{cc}}{K_{d,cc} - \frac{0.1}{1 + (\frac{k_{d3,cc}}{[ATP]})^5}} \\
 d^*_{cc} &= \frac{[DAG]_{cc}}{K_{d,cc}} \\
 g_{cc} &= \frac{[G_\alpha - GTP]_{cc}}{K_{g,cc}} \\
 R_{PKC,cc} &= \frac{[DAG]_{cc}[Ca^{2+}]_i}{K_{p,cc}(K_{c,cc} + [Ca^{2+}]_i)} \\
 r_{cc} &= \frac{R_{PKC,cc}}{K_{R,cc}} \\
 R_{PLC,cc} &= \frac{(d^*_{cc})^{n_{cc}}(g_{cc})^{m_{cc}}}{(1 + (d^*_{cc})^{n_{cc}})(1 + (g_{cc})^{m_{cc}})(1 + (r_{cc}^{o_{cc}}))}
 \end{aligned} \tag{S1}$$

These expressions dictate the DAG, ATP, and  $Ca^{2+}$  dependent activities of PKC and PLC. The  $d$  terms reflect ATP-dependent and spontaneous (ATP-independent) activation of PLC to capture  $Ca^{2+}$  transients triggered by P2Y receptor activation versus rest conditions, respectively, as we will describe further below.

These terms are then used to evaluate state models for the GTP-bound Ga protein, activate P2Y receptors, and DAG/IP3 as follows:

$$\begin{aligned}
[IP_3]_{cc} &= [DAG]_{cc} \\
\frac{d[G_\alpha - GTP]_{cc}}{dt} &= k_{g,cc} \frac{[ATP]_{*cc} [P2Y]_{cc}}{k_{a,cc} + [ATP]_{*cc}} [P2Y]_{cc} ([G_{\alpha,total}]_{cc} - [G_\alpha - GTP]_{cc}) \\
&\quad - h_{g,cc} [G_\alpha - GTP]_{cc} \\
\frac{d[P2Y]_{cc}}{dt} &= k_{P2Y,cc} ([P2Y]_{total,cc} - [P2Y]_{cc}) - h_{P2Y,cc} [P2Y]_{cc} R_{PKC,cc} \\
\frac{d[DAG]_{cc}}{dt} &= k_{d,cc} R_{PLC,cc} - h_{d,cc} [DAG]_{cc} + \gamma [ATP]_{*cc}
\end{aligned} \tag{S2}$$

Eqns S2 are called twice per time-step in the model, to reflect the different values of  $R_{PLC,cc}$  computed for ATP-dependent and spontaneous conditions, as well as ‘activity’ terms used for determining activated  $G_\alpha$ :

$$\begin{aligned}
[ATP]_{cc} &= \frac{0.010}{(1 + \frac{kd_{1,cc}}{[ATP]})} + \frac{0.010}{(1 + \frac{kd_{2,cc}}{[UTP]})} \\
[ATP]_{*cc} &= 0.010
\end{aligned} \tag{S3}$$

The first expression reflects that ATP and UTP can be used to trigger the P2Y receptors that are commonly expressed in microglia, e.g. P2Y2 and P2Y6 [12, 15] (see main text for further elaboration). The second expression is chosen to be a constant in order to reflect ATP-independent activity at resting conditions that culminates in spontaneous  $Ca^{2+}$  release from s [30]. We also utilized the  $Ca^{2+}$ -dependent model for PKC activation from [6], though some PKC isoforms may be activated in a  $Ca^{2+}$ -independent fashion [19]. Lastly, the original CC model reflects PKC-dependent inhibition of  $G_{\alpha q}$ , whereas more recent studies instead implicate PKC inhibition of PLC- $\beta$  [19]. Accordingly, we removed the PKC-dependent  $G_{\alpha q}$  inhibition step in favor of PKC/PLC- $\beta$  inhibition (Eqn S1). PLC- $\beta$  activity may also be influenced by  $Ca^{2+}$  [19], but we omitted this potential dependence owing to the lack of data to describe the dependency. Corresponding parameters for these equations are provided in Table S3.

-mediated  $Ca^{2+}$  release from the ER is described by the following equations from :

Table S3: Parameters associated with the CC model listed in Eqn S3-S2. Values in the parentheses reflect activity at resting (ATP-independent) conditions.

| Parameters             | Values    | Units   |
|------------------------|-----------|---------|
| $K_{g,cc}$             | 51        | nM      |
| $K_{d,cc}$             | 4.4 (2.9) | nM      |
| $K_{s,cc}$             | 5         | nM      |
| $K_{p,cc}$             | 40        | nM      |
| $K_{e,cc}$             | 20        | nM      |
| $k_{g,cc}$             | 20        | 1/s     |
| $k_{c,cc}$             | 700       | nM/s    |
| $h_{c,cc}$             | 0.4       | 1/s     |
| $k_{d,cc}$             | 31        | nM/s    |
| $k_{d1,cc}$            | 20        | $\mu$ M |
| $k_{d2,cc}$            | 10        | $\mu$ M |
| $k_{d3,cc}$            | 170       | $\mu$ M |
| $h_{d,cc}$             | 0.62      | 1/s     |
| $k_{a,cc}$             | 10        | $\mu$ M |
| $k_{P2Y,cc}$           | 0.01      | 1/s     |
| $h_{P2Y,cc}$           | 10        | 1/s     |
| $n_{cc}$               | 2         |         |
| $m_{cc}$               | 4         |         |
| $o_{cc}$               | 1         |         |
| $K_{R,cc}$             | 0.5       |         |
| $r_{g,cc}$             | 1.0       | nM/s    |
| $h_{g,cc}$             | 5.0       | 1/s     |
| $[G_{\alpha}]_{total}$ | 150       | nM      |
| $[P2Y]_{total}$        | 150       | nM      |
| $\gamma$               | 10        |         |

$$\begin{aligned}
e_{1,yk} &= 1 + \frac{[IP_3]_{yk}}{d_{1,yk}} \\
e_{2,yk} &= 1 + \frac{[IP_3]_{yk}}{d_{3,yk}} \\
x_{011,yk} &= \frac{1 - (x_{000,yk}e_{1,yk} + x_{010,yk}e_{1,yk} + x_{001,yk}e_{3,yk})}{e_{3,yk}} \\
x_{110,yk} &= \frac{x_{010,yk}[IP_3]_{yk}}{d_{1,yk}} \\
x_{111,yk} &= \frac{x_{011,yk}[IP_3]_{yk}}{d_{3,yk}} \\
x_{100,yk} &= \frac{x_{000,yk}[IP_3]_{yk}}{d_{1,yk}} \\
x_{101,yk} &= \frac{x_{001,yk}[IP_3]_{yk}}{d_{3,yk}} \\
V_{1,yk} &= a_{4,yk}([Ca^{2+}]_{i,yk}x_{000,yk} - d_{4,yk}x_{001,yk}) \\
V_{2,yk} &= a_{4,yk}([Ca^{2+}]_{i,yk}x_{010,yk} - d_{4,yk}x_{011,yk}) \\
V_{3,yk} &= a_{5,yk}([Ca^{2+}]_{i,yk}x_{000,yk} - d_{5,yk}x_{010,yk}) \\
V_{4,yk} &= a_{5,yk}([Ca^{2+}]_{i,yk}x_{001,yk} - d_{5,yk}x_{011,yk}) \\
J_{1,yk} &= c_{1,yk}(v_{1,yk}x_{110,yk}^3 + v_{2,yk})([Ca^{2+}]_{ER,yk} - [Ca^{2+}]_{i,yk}) \\
J_{2,yk} &= \frac{v_{3,yk}[Ca^{2+}]_{i,yk}}{[Ca^{2+}]_{i,yk}^2 + k_{3,yk}^2} \\
\frac{dx_{000,yk}}{dt} &= -V_{1,yk} - V_{3,yk} \\
\frac{dx_{001,yk}}{dt} &= V_{1,yk} - V_{4,yk} \\
\frac{dx_{010,yk}}{dt} &= V_{3,yk} - V_{2,yk} \\
J_{IP_3R} &= (J_{1,yk} - J_{2,yk})f_{conversion}
\end{aligned} \tag{S4}$$

The  $x$  terms represent states of the involved in the channel's gating, such as those activating ER  $Ca^{2+}$  release (see  $J_{1,yk}$ ). The  $V$  terms help determine the  $Ca^{2+}$ -dependent inactivation of the (see  $J_{2,yk}$ ), which results in a negative feedback inhibition motif that gives rise to  $Ca^{2+}$  oscillations. The net  $Ca^{2+}$  released by the ,  $J_{IP_3R}$  reflects the competing activation and inactivation terms. Parameters used in these equations are given in Table S4.

This model assumes  $Ca^{2+}$  release as a deterministic process, though the  $Ca^{2+}$  transients resemble stochastic spiking in experiment [26]. We note that the parameters provided for the respective CC and YK models used different units (e.g.  $\mu M$  vs  $nM$ ), therefore conversion factors were used to align the units.

The corresponding sets of equations are now In this model, there are two sets of equations to reproduce the  $Ca^{2+}$  transients mediated by the  $IP_3R$  activity.

The first set of the Cuthbertson-Chay and Young-Kaizer model equation

Table S4: Parameters associated with **S3**. Values in the parentheses reflect activity at resting (ATP-independent) conditions.

| Parameters       | Values                  | Units                          |
|------------------|-------------------------|--------------------------------|
| $c_{0,yk}$       | 2.0                     | $\mu\text{M}$                  |
| $c_{1,yk}$       | 0.185                   |                                |
| $v_{1,yk}$       | $2.0 \times 10^3$ (100) | 1/s                            |
| $v_{2,yk}$       | 0.11                    | 1/s                            |
| $v_{3,yk}$       | 0.9                     | $1/(\mu\text{M}\cdot\text{s})$ |
| $k_{3,yk}$       | 0.1                     | $\mu\text{M}$                  |
| $k_{4,yk}$       | 1.1                     | $\mu\text{M}$                  |
| $a_{1,yk}$       | $4.0 \times 10^2$       | $1/(\mu\text{M}\cdot\text{s})$ |
| $a_{2,yk}$       | 0.2                     | $1/(\mu\text{M}\cdot\text{s})$ |
| $a_{3,yk}$       | $4.0 \times 10^2$       | $1/(\mu\text{M}\cdot\text{s})$ |
| $a_{4,yk}$       | 0.2                     | $1/(\mu\text{M}\cdot\text{s})$ |
| $a_{5,yk}$       | 20                      | $1/(\mu\text{M}\cdot\text{s})$ |
| $d_{1,yk}$       | $3.0 \times 10^{-3}$    | $\mu\text{M}$                  |
| $d_{3,yk}$       | $6.0 \times 10^{-3}$    | $\mu\text{M}$                  |
| $d_{4,yk}$       | 0.4                     | $\mu\text{M}$                  |
| $d_{5,yk}$       | $5.0 \times 10^{-3}$    | $\mu\text{M}$                  |
| $f_{conversion}$ | 30 (200)                | $\text{nM}/\mu\text{M}$        |

is less ATP sensitive and results in larger spikes as the receptor is activated by IP3. The second set of the model equations generates ATP-independent  $\text{Ca}^{2+}$  oscillations[30], the amplitude of which is smaller than the oscillations generated by the ATP-dependent model (the first set).

Although there is no direct evidence that  $IP_3$  maintains the  $\text{Ca}^{2+}$  baseline transients, it is fair to say that the  $IP_3$ -mediated pathway is not amplified rather than terminated or silenced due to the absence of ATP. Therefore, instead of developing a new set of mathematical expressions to mimic spontaneous  $\text{Ca}^{2+}$  baseline, we again adapted the CC and YK integrated model with slightly tuned parameters to mimic the randomness of the baseline transients but the mathematical expression remains a deterministic model.

The input and fitted parameters are reflected in Tables **S3** and **S4**) to best reproduce experimentally-measured intracellular  $\text{Ca}^{2+}$  transients in microglia.

The difference between the ATP-dependent and independent equations are marked by asterisk (\*) in Eqn **S3**. The  $[ATP]_{cc}$  in the ATP-dependent mechanism is the trigger for the subsequent pathways, whose magnitude is based on both the concentration of ATP and UTP, since the majority of  $P2Y$  receptor consists of P2Y2 and P2Y6 [12, 15]. On the other hand, the ATP-independent mechanism is simply expressed as a constant variable that triggers consistent oscillatory waveform of  $\text{Ca}^{2+}$  in the system to mimic the baseline in microglia [30]. Unless it is listed, the ATP-independent  $\text{Ca}^{2+}$  baseline transients were generated by the identical model with the set of adjusted parameters listed in Table **S3** and **S4**.

The YK model also includes feedback inhibition of IP3R by  $\text{Ca}^{2+}$ [31]. Although PLC- $\beta$  is calcium-dependent, it is omitted in the model for simplicity [19].

$$\begin{aligned}
[IP_3]_{yk} &= [IP_3]_{cc}/1000 \quad (nM \rightarrow \mu M) \\
[Ca^{2+}]_{i,yk} &= [Ca^{2+}]_i/1000 \quad (nM \rightarrow \mu M) \\
[Ca^{2+}]_{ER,yk} &= [Ca^{2+}]_{ER}/1000 \quad (nM \rightarrow \mu M)
\end{aligned} \tag{S5}$$

To integrate two models, the calculation performs the unit conversion for  $[IP_3]$ ,  $[Ca^{2+}]_i$  and  $[Ca^{2+}]_{ER}$  as shown Eqn S5.

### S.2.2 Markov State Modeling based P2X receptor kinetic model

The following parameters were refit from [4] (P2X-only) to reflect simultaneous contributions from P2X and P2Y-class receptors.

*P2X4* The mathematical expression is available in the previous work [4].

Table S5: Parameters associated with *P2X4* receptor kinetics

| Parameters | Values             | Units   |
|------------|--------------------|---------|
| $k_1$      | 1.0                | 1/s     |
| $k_2$      | $2.61 \times 10^5$ | 1/(M×s) |
| $k_3$      | 0.1                | 1/s     |
| $k_4$      | $1.6 \times 10^5$  | 1/(M×s) |
| $k_5$      | 0.25               | 1/s     |
| $k_6$      | $8.0 \times 10^6$  | 1/(M×s) |
| $H_1$      | 0.02               | 1/s     |
| $H_2$      | 0.0                | 1/s     |
| $H_6$      | 0.1                | 1/s     |

*P2X7* Equations describing *P2X7* activation are described below:

$$\begin{aligned}
s &= \frac{1}{1 + \left(\frac{k_d}{[ATP]}\right)^n} \\
k_4 &= k_{4,low} - s(k_{4,low} - k_{4,high}) \\
k_6 &= k_{6,low} - s(k_{6,low} - k_{6,high}) \\
h_7 &= H_{7,low} + s(H_{7,high} - H_{7,low}) \\
h_{1,p} &= 2k_4[ATP] \\
h_{1,m} &= 2k_3 \\
h_{2,p} &= k_6[ATP] \\
h_{2,m} &= 3k_5 \\
H_2 &= \frac{h_{2,p}}{h_{2,m}} \\
y_{1,p} &= h_{1,p} \\
y_{1,m} &= \frac{h_{1,m}}{1 + H_2}
\end{aligned} \tag{S6}$$

$$\begin{aligned}
D_1 &= 1 - (D_2 + D_{34} + C_1 + C_2 + Q_{12}) \\
\frac{dD_2}{dt} &= 3k_2[ATP]D_1 + H_2C_2 + y_{1,m}D_{34} - (k_1 + y_{1,p} + H_7)D_2 \\
\frac{dD_{34}}{dt} &= y_{1,p}D_2 - y_{1,m}D_{34} \\
\frac{dC_1}{dt} &= H_1D_1 + k_1C_2 - 3k_2[ATP]C_1 \\
\frac{dC_2}{dt} &= H_7D_2 + 3k_2[ATP]C_1 + y_{1,m}Q_{12} - (k_1 + y_{1,p} + H_2)C_2 \\
\frac{dQ_{12}}{dt} &= y_{1,p}C_2 - y_{1,m}Q_{12}
\end{aligned}$$



Table S6: Parameters associated with  $P2X7$  receptor kinetics from Eqn S6. An ATP-dependent scaling term  $s$  is introduced to limit  $P2X7$  activation for low micromolar ATP concentrations that tend to exclusively activate  $P2X4$  receptors [28, 17, 3, 4].

| Parameters   | Values               | Units   |
|--------------|----------------------|---------|
| $k_1$        | 190                  | 1/s     |
| $k_2$        | $8.13 \times 10^3$   | 1/(M×s) |
| $k_3$        | 0.04                 | 1/s     |
| $k_5$        | 0.07                 | 1/s     |
| $H_1$        | $5.0 \times 10^{-3}$ | 1/s     |
| $H_2$        | 0.3                  | 1/s     |
| $H_5$        | 0.0                  | 1/s     |
| $H_6$        | 0.0                  | 1/s     |
| $k_{4,low}$  | $1.0 \times 10^2$    | 1/(M×s) |
| $k_{6,low}$  | $5.0 \times 10^2$    | 1/(M×s) |
| $H_{7,low}$  | $1.0 \times 10^3$    | 1/s     |
| $k_{4,high}$ | $7.0 \times 10^3$    | 1/(M×s) |
| $k_{6,high}$ | 0.1                  | 1/(M×s) |
| $H_{7,high}$ | 0.008                | 1/s     |
| $k_d$        | 420                  | $\mu M$ |
| $n$          | 15                   |         |

### S.2.3 Homeostasis Equations in Microglia

**Ca<sup>2+</sup>-handling in the ER lumen ( $[Ca^{2+}]_{ER}$ )** Our model for Ca<sup>2+</sup> handling in the ER (Eqn S7) reflects of the Ca<sup>2+</sup> release via SERCA ( $J_{ERtoCyt,SERCA}$ ), buffer by calsequestrin or other ER-resident Ca<sup>2+</sup> binding proteins ( $R_{Ca^{2+}.S}$ ), and Ca<sup>2+</sup> release via IP<sub>3</sub> receptors ( $J_{IP_3R,ATP-dependent}$  and  $J_{IP_3R,ATP-independent}$ ). The term denoted ‘ATP-independent’ represents baseline activity for resting microglia. The leak term ( $J_{ERtoCy,Leak}$ ) represents residual Ca<sup>2+</sup> from the ER to offset SERCA Ca<sup>2+</sup> uptake. Detailed expressions for these contributions are found in our previous work [4].

$$\begin{aligned} \frac{d[Ca^{2+}]_{ER}}{dt} = & J_{ERtoCyt,SERCA} - R_{Ca^{2+}.S} - J_{ERtoCy,Leak} \frac{V_{microglia}}{V_{ER}} \\ & - J_{IP_3R,ATP-dependent} - J_{IP_3R,ATP-independent} \end{aligned} \quad (S7)$$

**Homeostasis in Cytoplasm domain ( $[Ca^{2+}]_i$ )** Our model for Ca<sup>2+</sup> handling in the cytoplasm domain (Eqn S8) consists of Ca<sup>2+</sup> uptake via SERCA ( $J_{CytoER,SERCA}$ ), buffering by the calmodulin-calcineurin complex ( $R_{Ca.F}$ ,  $R_{Ca.B}$ , and  $R_{Ca.CaM-CN}$ ), and Ca<sup>2+</sup> release via IP<sub>3</sub> receptors ( $J_{IP_3R,ATP-dependent}$  and  $J_{IP_3R,ATP-independent}$ ). Plasma membrane contributions to the cytosolic Ca<sup>2+</sup> include the sodium/calcium exchanger (NCX) activity ( $J_{NCX}$ ) and P2X receptors ( $J_{P2X7} + J_{P2X4}$ ) introduced in [4]. The leak terms ( $J_{ERtoCy,Leak}$  and  $J_{ExtoCy,Leak}$ ) ensure the system remains in steady state at rest. Detailed expressions for these contributions are found in our previous work [4].

$$\begin{aligned} \frac{d[Ca^{2+}]_i}{dt} = & J_{P2X7} + J_{P2X4} + J_{ExtoCy,Leak} + J_{NCX} + J_{ERtoCy,Leak} \\ & + J_{IP_3R,ATP-dependent} + J_{IP_3R,ATP-independent} \\ & - (J_{CytoER,SERCA} + R_{Ca^{2+}.F} + R_{Ca^{2+}.B} \\ & + R_{Ca^{2+}.CaM-CN}) \end{aligned} \quad (S8)$$

Parameters for our model are provided in Tables S7-S10.

Table S7: Parameters associated with inward current from P2X receptors (equations associated with this set of parameters are listed in [4])

| Parameters             | Values                 | Units                  |
|------------------------|------------------------|------------------------|
| $G_{12,P2X4}$          | $8.15 \times 10^{-10}$ | $\frac{C}{s \times V}$ |
| $G_{12,P2X7}$          | $2.0 \times 10^{-8}$   | $\frac{C}{s \times V}$ |
| $E_{12,P2X4}$          | 0.0                    | V                      |
| $E_{12,P2X7}$          | 0.0                    | V                      |
| $f_{I_{Ca^{2+}},P2X4}$ | 0.0824                 |                        |
| $f_{I_{Ca^{2+}},P2X7}$ | 0.1                    |                        |
| $f_{conv.,P2X4}$       | 11                     |                        |
| $f_{conv.,P2X7}$       | 1                      |                        |

Table S8: Parameters for NCX activity. The corresponding equations were adapted from Shannon-Bers model [25] and listed in the previous work [4]

| Parameters            | Values                | Units |
|-----------------------|-----------------------|-------|
| $Q_{10}$              | 1.20                  |       |
| $Kd_{Act}$            | 40.0                  | nM    |
| $n_H$                 | 3.44                  |       |
| $H_{Na}$              | 3.60                  |       |
| $V_{max}$             | 35                    | A/F   |
| $\eta$                | 0.70                  |       |
| $k_{sat}$             | 0.04                  |       |
| $K_{max,[Ca^{2+}]_i}$ | $3.63 \times 10^3$    | nM    |
| $K_{max,[Na^+]_i}$    | $1.23 \times 10^7$    | nM    |
| $K_{max,[Na^+]_e}$    | $8.75 \times 10^7$    | nM    |
| $K_{max,[Ca^{2+}]_e}$ | $1.30 \times 10^6$    | nM    |
| $C_{mem}$             | $1.2 \times 10^{-11}$ | F     |

Table S9: Parameters for SERCA activity. The corresponding equations were adapted from Shannon-Bers model [25] and listed in the previous work [4]

| Parameters | Values             | Units |
|------------|--------------------|-------|
| $Q_{10}$   | 2.6                |       |
| $V_{max}$  | $9.09 \times 10^6$ | nM/s  |
| $K_f$      | $2.80 \times 10^2$ | nM    |
| $K_r$      | $2.10 \times 10^6$ | nM    |
| $H$        | 1.787              |       |

Table S10: Parameters for CaM-dependent activation of calcineurin. The corresponding equations were adapted from [2, 11] and listed in the previous work [4].

| Parameters      | Values               | Units               |
|-----------------|----------------------|---------------------|
| $k_{ab}$        | $1.0 \times 10^{-5}$ | $1/(nM^2 \times s)$ |
| $k_{ba}$        | 10.0                 | 1/s                 |
| $k_{bc}$        | $1.0 \times 10^{-4}$ | $1/(nM^2 \times s)$ |
| $k_{cb}$        | $1.0 \times 10^3$    | 1/s                 |
| $k_{on,A}$      | $1.0 \times 10^{-2}$ | $1/(nM \times s)$   |
| $k_{off,A}$     | 1.0                  | 1/s                 |
| $k_{on,B}$      | $2.0 \times 10^{-6}$ | $1/(nM^2 \times s)$ |
| $k_{off,B}$     | 1.0                  | 1/s                 |
| $[CaM]_{total}$ | 100                  | nM                  |
| $[CN]_{total}$  | 67                   | nM                  |

Table S11: Parameters  $\text{Ca}^{2+}$  buffer interaction calculations. The equations associated with the rest of the buffers were adapted from [25] and listed in the previous work [4].

| Parameters   | Values            | Units                           |
|--------------|-------------------|---------------------------------|
| $B_{max,F}$  | $2.5 \times 10^4$ | nM                              |
| $k_{on,F}$   | 0.15              | $1/(\text{nM} \times \text{s})$ |
| $k_{off,F}$  | 23.0              | 1/s                             |
| $B_{max,Br}$ | $1.0 \times 10^4$ | nM                              |
| $k_{on,B}$   | 1.0               | $1/(\text{nM} \times \text{s})$ |
| $k_{off,B}$  | $1.0 \times 10^3$ | 1/s                             |
| $B_{max,S}$  | $1.4 \times 10^5$ | nM                              |
| $k_{on,S}$   | 0.1               | $1/(\text{nM} \times \text{s})$ |
| $k_{off,S}$  | $6.5 \times 10^4$ | 1/s                             |

#### S.2.4 Miscellaneous signal transduction

**NFAT** The NFAT model used in our study was adapted from Cooling *et al*[5] and implemented to link NFAT activation to  $\text{TNF}\alpha$  synthesis [33]. The equations listed in the previous work [4] were utilized with the parameters (Table S12) fitted in this study.

Table S12: Parameters for NFAT cycle calculations. The corresponding equations were adapted from [5] and listed in the previous work [4].

| Parameters              | Values                | Units                           |
|-------------------------|-----------------------|---------------------------------|
| $k_{f,1}$               | $9.79 \times 10^{-7}$ | $1/(\text{nM} \times \text{s})$ |
| $k_{r,1}$               | $1.93 \times 10^{-2}$ | 1/s                             |
| $k_{f,2}$               | $7.00 \times 10^{-3}$ | 1/s                             |
| $k_{f,3}$               | $3.62 \times 10^{-4}$ | 1/s                             |
| $k_{r,3}$               | $4.71 \times 10^{-5}$ | $1/(\text{nM} \times \text{s})$ |
| $k_{f,4}$               | $1.00 \times 10^{-4}$ | 1/s                             |
| $C_{cn}$                | 10                    |                                 |
| $[\text{NFAT}]_{total}$ | 1.2                   | nM                              |

**p-p38** The phosphorylation of p38 was simulated by the mathematical model implemented in the previous work [4] to relate phosphorylated p38 to  $\text{TNF}\alpha$  synthesis.

#### S.2.5 $\text{TNF}\alpha$

According to a report from Barbera *et al*[1], matured  $\text{TNF}\alpha$  is present inside the cell and can be exocytosed following the activation of ionotropic P2 receptors. Our model for this process is provide in Eqn S9.

Table S13: Parameters for phosphorylation of p38 calculations. The equations associated with p38 were adapted from [29] and listed in the previous work [4].

| Parameters       | Values                | Units |
|------------------|-----------------------|-------|
| $[pp38]_{total}$ | 100                   |       |
| $k_{b,pp38}$     | $8.51 \times 10^{-4}$ | 1/s   |
| $k_{f,pp38}$     | $1.1 \times 10^{-2}$  | 1/s   |
| $k_{d,pp38}$     | 150                   | nM    |
| $n_{pp38}$       | 5                     |       |

$$\begin{aligned}
 \frac{d[TNF\alpha]_c}{dt} &= D_{nc}([TNF\alpha] - [TNF\alpha]_c) \\
 &\quad - ([TNF\alpha]_c - [TNF\alpha]_e) \left( \frac{D_{exo}}{1 + \left( \frac{k_d}{([Ca^{2+}]_i - [Ca^{2+}]_o)} \right)} \right) \\
 \frac{d[TNF\alpha]_e}{dt} &= ([TNF\alpha]_c - [TNF\alpha]_e) \left( \frac{D_{exo}}{1 + \left( \frac{k_d}{([Ca^{2+}]_i - [Ca^{2+}]_o)} \right)} \right)
 \end{aligned} \tag{S9}$$

Table S14: Parameters for simulating TNF $\alpha$  synthesis [4] and the additional equations for the exocytosis of TNF $\alpha$  listed in Eqn S9

| Parameters          | Values                | Units                   |
|---------------------|-----------------------|-------------------------|
| $k_{transcript}$    | $2.78 \times 10^{-4}$ | 1/s                     |
| $k_{trnst}$         | $2.0 \times 10^{-4}$  | 1/s                     |
| $k_{deg,TNF\alpha}$ | $1.38 \times 10^{-2}$ | 1/s                     |
| $k_{deg,mRNA}$      | $1.35 \times 10^{-4}$ | 1/s                     |
| $IC50_1$            | 0.4                   |                         |
| $n_1$               | 2                     |                         |
| $IC50_2$            | 75.0                  |                         |
| $n_2$               | 5.5                   |                         |
| $k_{exp,f}$         | $5.11 \times 10^{-4}$ | 1/(molecule $\times$ s) |
| $k_{exp,r}$         | $1.78 \times 10^{-4}$ | 1/s                     |
| $D_{nc}$            | 10.0                  | 1/s                     |
| $D_{exo}$           | 5.0                   | 1/s                     |
| $k_d$               | 25.0                  | nM                      |
| $[Ca^{2+}]_o$       | 100.0                 | nM                      |

### S.2.6 P2Y12-mediated Signaling and Chemotaxis

Ohsawa *et al* [22, 23] determined that P2Y12 activation drives migration following ADP treatment (a product of ATP degradation by CD39). [15, 21]. Their latter work determined the augmentation of migration via ionotropic P2 receptor stimulation that promotes  $\text{Ca}^{2+}$  entry into the cell. Our model for chemotaxis includes both P2Y12 activation and the elevation of intracellular  $\text{Ca}^{2+}$  from P2X4 and P2X7 receptors (Eqn S10).

$$\begin{aligned}\frac{d[\text{Signal}_{\text{Ca}^{2+}}]}{dt} &= k_{f,6}([\text{Ca}^{2+}]_i - [\text{Ca}^{2+}]_o) - k_{b,6}[\text{Signal}_{\text{Ca}^{2+}}] \\ \frac{d[\text{P2Y12}]_{act}}{dt} &= k_{f,1}(f_{\text{P2Y12}}([\text{P2Y12}]_{total}\rho_{\text{P2Y12}} - [\text{P2Y12}]_{act}) \\ &\quad + f_{\text{Ca}^{2+}}\text{Signal}_{\text{Ca}^{2+}})[\text{ADP}] - k_{b,1}[\text{P2Y12}]_{act}\end{aligned}\quad (\text{S10})$$

As shown by Ohsawa *et al*[22, 23], PI3K activation and Akt phosphorylation are proportional to P2Y12 activity. This process proceeds through the activation of Gi/o. (Eqn S11).

$$\begin{aligned}\frac{d[\text{G}_{i/o}]}{dt} &= [\text{P2Y12}]_{act}k_{f,2} - k_{deg,1}[\text{G}_{i/o}]^2 \\ \frac{d[\text{PI3K}]_s}{dt} &= k_{f,3}\text{Signal}_{\text{Ca}^{2+}}([\text{PI3K}]_{tot} - [\text{PI3K}]_s - [\text{PI3K}]_{act}) \\ &\quad - k_{b,3}[\text{PI3K}]_s - k_{f,4}[\text{PI3K}]_s[\text{G}_{i/o}]\end{aligned}\quad (\text{S11})$$

$$\begin{aligned}\frac{d[\text{PI3K}]_{act}}{dt} &= k_{f,4}[\text{PI3K}]_s[\text{G}_{i/o}] - k_{b,4}[\text{PI3K}]_{act} \\ \frac{d[\text{pAkt}]}{dt} &= k_{f,5}([\text{Akt}]_{total} - [\text{pAkt}])([\text{PI3K}]_{act} - k_{b,5}[\text{pAkt}])\end{aligned}$$

Chemotaxis in our model scales with the active states of pAkt[22] and CaM[8] :

$$\begin{aligned}\text{Signal}_{\text{pAkt}} &= \frac{1}{1 + \left(\frac{k d_{\text{pAkt}}}{[\text{pAkt}]}\right)} \\ \text{Signal}_{\text{CaM}} &= \frac{1}{1 + \left(\frac{k d_{\text{CaM}}}{[\text{Ca}_4\text{CaM}] - [\text{CaM}]_0}\right)} \\ \frac{dV_{mig}}{dt} &= k_{f,mig}(\text{Signal}_{\text{pAkt}} + 0.05\text{Signal}_{\text{CaM}}) - k_{r,mig}V_{mig} \\ \Delta\text{Distance}_{mig} &= V_{mig}\Delta t\end{aligned}\quad (\text{S12})$$

Table S15: Parameters for simulating *P2Y12*-mediated Chemotaxis listed in Eqn S10-S12

| Parameters        | Values  | Units |
|-------------------|---------|-------|
| $f_{P2Y12}$       | 0.7     |       |
| $f_{Ca^{2+}}$     | 0.3     |       |
| $k_{f,1}$         | 0.008   | 1/s   |
| $k_{b,1}$         | 0.02    | 1/s   |
| $k_{f,2}$         | 0.1     | 1/s   |
| $k_{b,2}$         | 0.01    | 1/s   |
| $k_{f,3}$         | 0.01    | 1/s   |
| $k_{b,3}$         | 0.01    | 1/s   |
| $k_{f,4}$         | 0.00001 | 1/s   |
| $k_{b,4}$         | 0.01    | 1/s   |
| $k_{f,5}$         | 0.001   | 1/s   |
| $k_{b,5}$         | 0.1     | 1/s   |
| $k_{f,6}$         | 0.001   | 1/s   |
| $k_{b,6}$         | 0.01    | 1/s   |
| $k_{deg,1}$       | 0.05    | 1/s   |
| $[P2Y12]_{total}$ | 100     |       |
| $[PI3K]_{total}$  | 100     |       |
| $[Akt]_{total}$   | 100     |       |

### S.2.7 Degradation of ATP by NTPDase1

Ectonucleoside triphosphate diphosphohydrolase-1 (E-NTPDase), also known as CD39, is a plasma-membrane protein that plays an important role in microglial migration by balancing ATP and adenosine molecules [9]. We have adapted the kinetic model of ATP degradation into ADP and AMP by CD39 introduced in the [18] to determine the ATP and ADP available for the purinergic receptors in our microglial models:

$$\begin{aligned}\frac{d[ATP]}{dt} &= -k_{1,deg}[ATP] \\ \frac{d[ADP]}{dt} &= k_{1,deg}[ATP] - k_{2,deg}[ADP] \\ \frac{d[AMP]}{dt} &= k_{2,deg}[ADP]\end{aligned}\tag{S13}$$

The parameters for these equations controlling nucleotide availability are given in Table S16.

Table S16: Parameters for the degradation of ATP by NTPDase listed in S13

| Parameters  | Values | Units |
|-------------|--------|-------|
| $k_{1,deg}$ | 0.002  | 1/s   |
| $k_{2,deg}$ | 0.008  | 1/s   |



### S.3 Figures

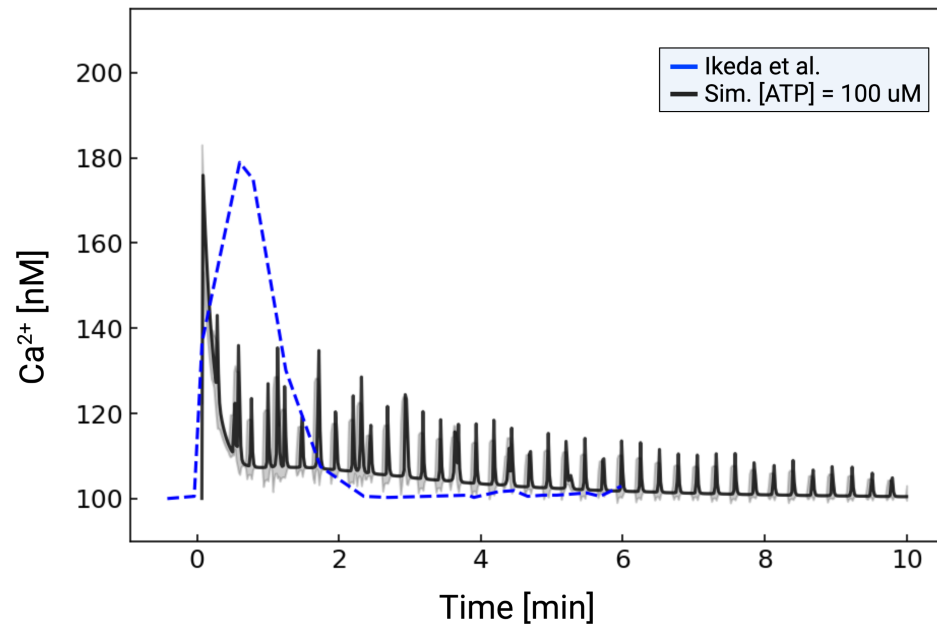

Figure S1: Predicted (black) versus experimentally measured (blue)  $\text{Ca}^{2+}$  responses following 100  $\mu\text{M}$  ATP. [14].

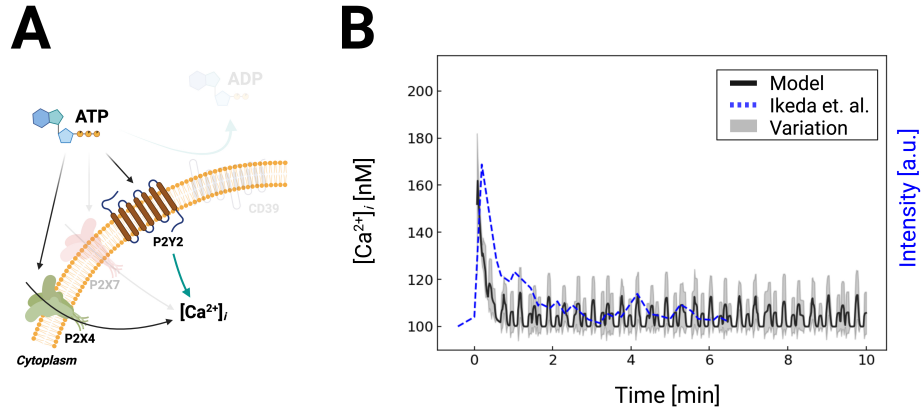

Figure S2: A) Schematic for  $Ca^{2+}$  waveforms generated by *P2X4* and *P2Y2* in response to 1mM ATP for 10 minutes, which does not include the degradation of ATP by CD39. B) Comparison of predicted (black: moving average with a window size of 8 reported along the left y-axis.) and experimentally-measured [14] (blue-dashed)  $Ca^{2+}$  transients reported along the right y-axis .

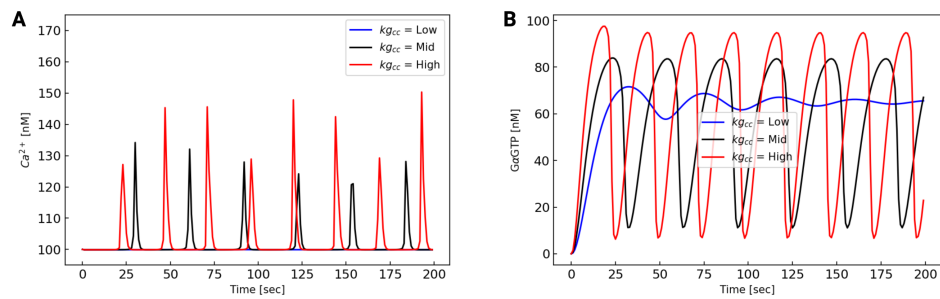

Figure S3: A) Intracellular  $Ca^{2+}$  transients and their corresponding B) oscillation of active  $G_{\alpha q}$  with respect to  $k_{g,cc}$  that controls the activation of  $G_{\alpha q}$ .

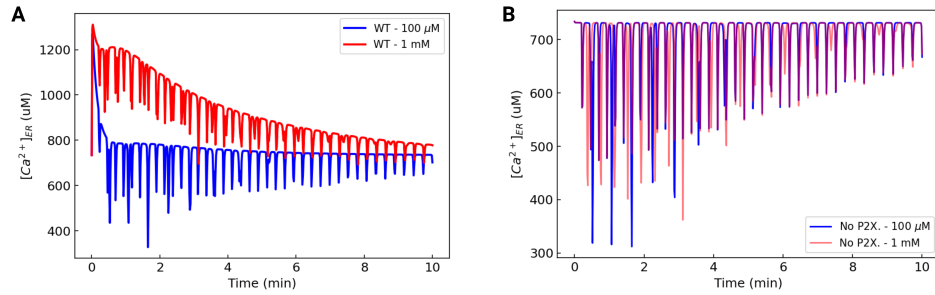

Figure S4: Comparison between  $Ca^{2+}$  transients induced by ER  $Ca^{2+}$  release via  $IP_3$ -mediated pathway at 100  $\mu$ M and 1 mM ATP concentrations in cytoplasm (A) and ER lumen (B). The WT microglia model was used for this prediction. The faded lines denote the contribution by  $P2Y$  receptor activation that results in ER  $Ca^{2+}$  release to the cytosolic domain. The data demonstrate the relationship between cytosolic and ER  $Ca^{2+}$  transients, which suggest that roughly 43.7% of  $Ca^{2+}$  is drawn from the ER at low ATP vs. 33.3% at high ATP.

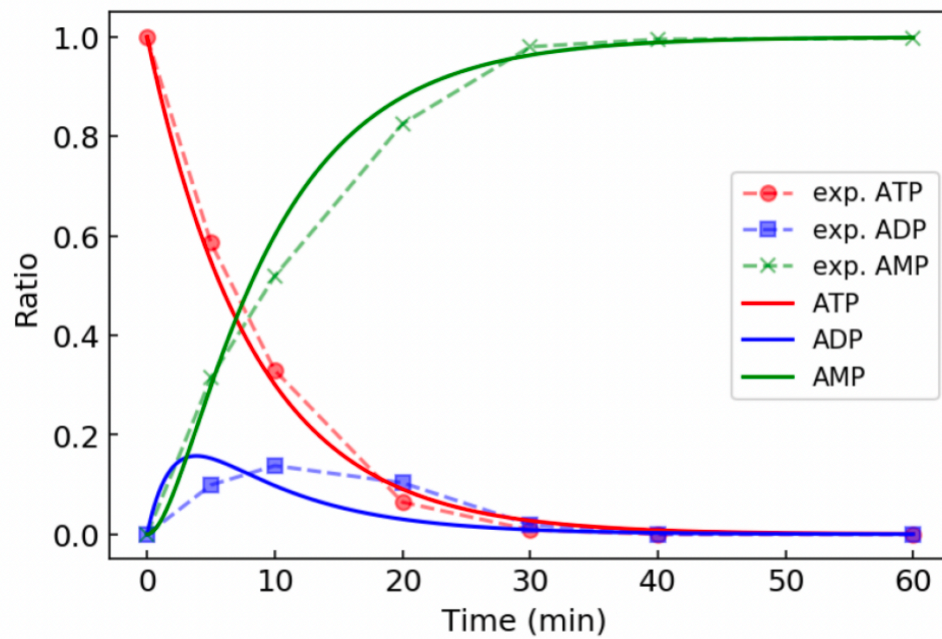

Figure S5: Validations of our model of ATP/ADP hydrolysis into AMP by CD39 against experimental data (dashed). Each nucleotide concentration was measured by Kukulski *et al* [18] in COS-7 cells.

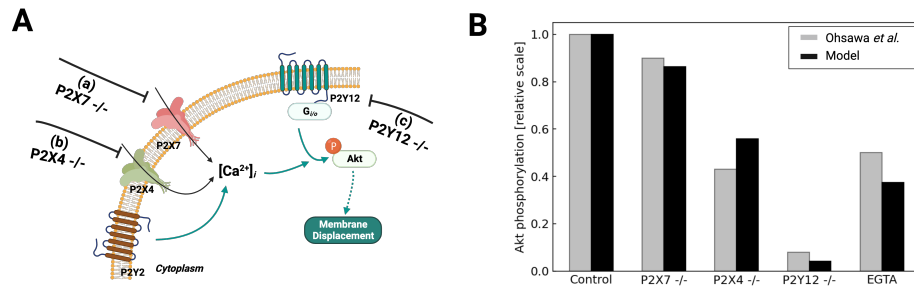

Figure S6: A) Schematic of P2Y12- and Ca-mediated migration in response to ATP, assuming control, P2X7 -/- (a), P2X4 -/- (b) and P2Y12 -/- (c) conditions. B) Predicted *pAkt* levels (black) versus experimental measurements by Ohsawa *et al* under control and a-c conditions [14].

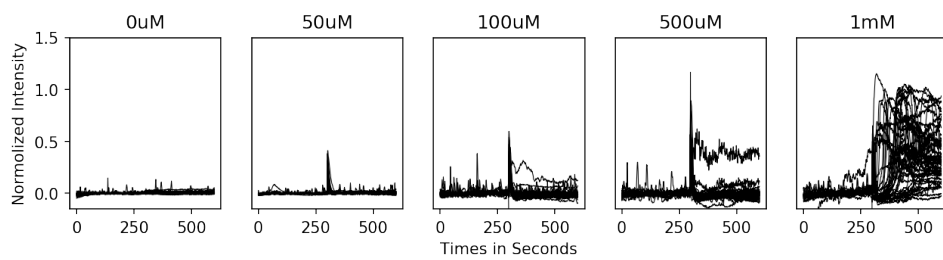

Figure S7: Traces of the fluorescence to measure the ATP-mediated  $\text{Ca}^{2+}$  transients in BV2 cells.

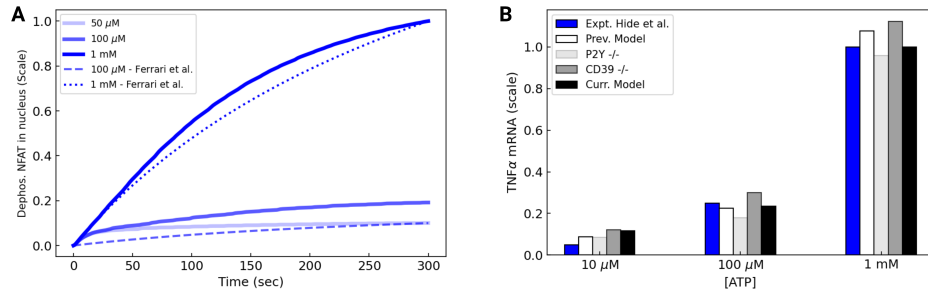

Figure S8: Predictions of dephosphorylated NFAT in nucleus over time (A) and TNF $\alpha$  mRNA with various computation configurations and comparison to the previously developed model[4] with respect to amplitude of stimulation (5). All simulations in B) were performed for 5 minutes. The plot is in the unit of scale, whose basis is the maximum increment measured by the current model.



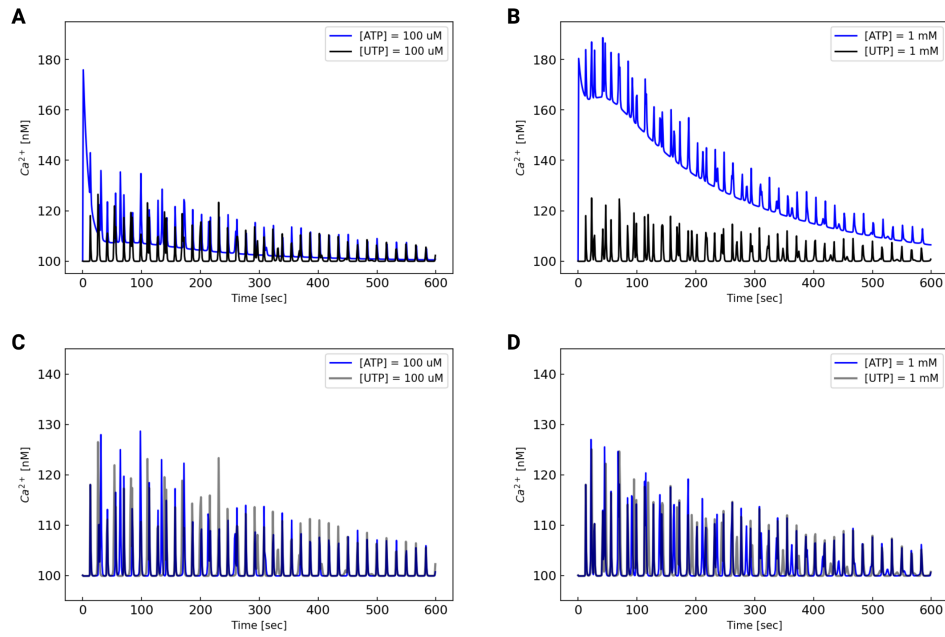

Figure S9: Simulation of  $Ca^{2+}$  transients in BV2 with 100  $\mu$ M and 1 mM ATP and UTP. Primary microglia with low (A) and high (B) ATP/UTP concentration whereas BV2 cells with low (C) and high (D) concentration of the stimulant. In this case, UTP selectively activates only P2Y2 receptors. [27].

## Bibliography

- [1] BARBERA-CREMADES, M., GOMEZ, A. I., BAROJA-MAZO, A., MARTINEZ-ALARCON, L., MARTINEZ, C. M., DE TORRE-MINGUELA, C., AND PELEGRIN, P. P2x7 receptor induces tumor necrosis factor alpha converting enzyme activation and release to boost tnfa production. *Frontiers in immunology* 8 (2017), 862.
- [2] BAZZAZI, H., SANG, L., DICK, I. E., JOSHI-MUKHERJEE, R., YANG, W., AND YUE, D. T. Novel fluorescence resonance energy transfer-based reporter reveals differential calcineurin activation in neonatal and adult cardiomyocytes. *Journal of Physiology* 593, 17 (2015), 3865--3884.
- [3] CHESSELL, I. P., MICHEL, A. D., AND HUMPHREY, P. P. A. Properties of the pore-forming P2X7 purinoceptor in mouse NTW8 microglial cells. *British Journal of Pharmacology* 121, 7 (1997), 1429--1437.
- [4] CHUN, B. J., STEWART, B. D., VAUGHAN, D. D., BACHSTETTER, A. D., AND KEKENES-HUSKEY, P. M. Simulation of p2x-mediated calcium signalling in microglia. *The Journal of Physiology* 597, 3 (2019), 799--818.
- [5] COOLING, M. T., HUNTER, P., AND CRAMPIN, E. J. Sensitivity of NFAT cycling to cytosolic calcium concentration: Implications for hypertrophic signals in cardiac myocytes. *Biophysical Journal* 96, 6 (2009), 2095--2104.
- [6] CUTHBERTSON, K., AND CHAY, T. Modelling receptor-controlled intracellular calcium oscillators. *Cell calcium* 12, 2-3 (1991), 97--109.
- [7] DE YOUNG, G. W., AND KEIZER, J. A single-pool inositol 1, 4, 5-trisphosphate-receptor-based model for agonist-stimulated oscillations in  $ca^{2+}$  concentration. *Proceedings of the National Academy of Sciences* 89, 20 (1992), 9895--9899.
- [8] FAN, Y., XIE, L., AND CHUNG, C. Y. Signaling pathways controlling microglia chemotaxis. *Molecules and cells* 40, 3 (2017), 163.
- [9] FÄRBER, K., MARKWORTH, S., PANNASCH, U., NOLTE, C., PRINZ, V., KRONENBERG, G., GERTZ, K., ENDRES, M., BECHMANN, I., ENJYOJI, K., ROBSON, S. C., AND KETTENMANN, H. The ectonucleotidase cd39/entpdase1 modulates purinergic-mediated microglial migration. *Glia* 56, 3 (2008), 331--341.
- [10] GARCIA-GUZMAN, M., SOTO, F., GOMEZ-HERNANDEZ, J. M., LUND, P. E., AND STUEHMER, W. Characterization of recombinant human P2X4 receptor reveals pharmacological differences to the rat homologue. *Molecular pharmacology* 51, 1 (1997), 109--118.
- [11] HEINEKE, J., AND MOLKENTIN, J. D. Regulation of cardiac hypertrophy by intracellular signalling pathways. *Nature Reviews Molecular Cell Biology* 7, 8 (2006), 589--600.
- [12] HICKMAN, S. E., KINGERY, N. D., OHSUMI, T. K., BOROWSKY, M. L., WANG, L.-C., MEANS, T. K., AND EL KHOURY, J. The microglial sensome revealed by direct rna sequencing. *Nature neuroscience* 16, 12 (2013), 1896.

- [13] HIDE, I., TANAKA, M., INOUE, A., NAKAJIMA, K., KOHSAKA, S., INOUE, K., AND NAKATA, Y. Extracellular ATP triggers tumor necrosis factor- $\alpha$  release from rat microglia. *Journal of Neurochemistry* 75, 3 (jan 2000), 965--972.
- [14] IKEDA, M., TSUNO, S., SUGIYAMA, T., HASHIMOTO, A., YAMOTO, K., TAKEUCHI, K., KISHI, H., MIZUGUCHI, H., KOHSAKA, S.-I., AND YOSHIOKA, T.  $\text{Ca}^{2+}$  spiking activity caused by the activation of store-operated  $\text{Ca}^{2+}$  channels mediates tnfa release from microglial cells under chronic purinergic stimulation. *Biochimica et Biophysica Acta (BBA)-Molecular Cell Research* 1833, 12 (2013), 2573--2585.
- [15] KETTENMANN, H., HANISCH, U.-K., NODA, M., AND VERKHRATSKY, A. Physiology of Microglia. *Physiol Rev* 91 (2011), 461--553.
- [16] KHADRA, A., YAN, Z., CODDOU, C., TOMIĆ, M., SHERMAN, A., AND STOJILKOVIC, S. S. Gating properties of the P2X2a and P2X2b receptor channels: Experiments and mathematical modeling. *The Journal of general physiology* 139, 5 (2012), 333--348.
- [17] KHADRA, A., YAN, Z., CODDOU, C., TOMIC, M., SHERMAN, A., AND STOJILKOVIC, S. S. Gating properties of the P2X2a and P2X2b receptor channels: Experiments and mathematical modeling. *The Journal of general physiology* 139, 5 (2012), 333--348.
- [18] KUKULSKI, F., LEVESQUE, S., LAVOIE, E., LECKA, J., BIGONNESSE, F., KNOWLES, A., ROBSON, S., KIRLEY, T., AND SEVIGNY, J. Comparative hydrolysis of p2 receptor agonists by ntpdases 1, 2, 3 and 8. *Purinergic signalling* 1, 2 (2005), 193.
- [19] LITOSCH, I. G protein co-signaling and challenges for translational research. *Translational Neuroscience* 4, 1 (2013), 66--73.
- [20] NAGAMOTO-COMBS, K., AND COMBS, C. K. Microglial Phenotype Is Regulated by Activity of the Transcription Factor, NFAT (Nuclear Factor of Activated T Cells). *Journal of Neuroscience* 30, 28 (jul 2010), 9641--9646.
- [21] NODA, MAMI AND VERKHRATSKY, A. Physiology of Microglia. In *Neuroglia*, B. Kettenmann, Helmut and Ransom, Ed., 3 ed. Oxford Univ Press, 2012, pp. 223--237.
- [22] OHSAWA, K., IMAI, Y., SASAKI, Y., AND KOHSAKA, S. Microglia/macrophage-specific protein Iba1 binds to fimbrin and enhances its actin-bundling activity. *Journal of Neurochemistry* 88, 4 (jan 2004), 844--856.
- [23] OHSAWA, K., IRINO, Y., NAKAMURA, Y., AKAZAWA, C., INOUE, K., AND KOHSAKA, S. Involvement of p2x4 and p2y12 receptors in atp-induced microglial chemotaxis. *Glia* 55, 6 (2007), 604--616.
- [24] ROBSON, S. C., SEVIGNY, J., AND ZIMMERMANN, H. The e-ntpdase family of ectonucleotidases: structure function relationships and pathophysiological significance. *Purinergic signalling* 2, 2 (2006), 409.

- [25] SHANNON, T. R., WANG, F., PUGLISI, J., WEBER, C., AND BERS, D. M. A mathematical treatment of integrated Ca dynamics within the ventricular myocyte. *Biophysical Journal* 87, 5 (2004), 3351--3371.
- [26] SKUPIN, A., KETTENMANN, H., WINKLER, U., WARTENBERG, M., SAUER, H., TOVEY, S. C., TAYLOR, C. W., AND FALCKE, M. How does intracellular Ca<sup>2+</sup> oscillate: by chance or by the clock? *Biophysical journal* 94, 6 (mar 2008), 2404--11.
- [27] SOPHOCLEOUS, A., R., MILES, A., N., OOI, L., SLUYTER, ., AND R. P2y2 and p2x4 receptors mediate ca<sup>2+</sup> mobilization in dh82 canine macrophage cells. *International Journal of Molecular Sciences* 21, 22 (2020), 8572.
- [28] TOULME, E., AND KHAKH, B. S. Imaging P2X4 receptor lateral mobility in microglia: Regulation by calcium and p38 MAPK. *Journal of Biological Chemistry* 287, 18 (2012), 14734--14748.
- [29] TRANG, T., BEGGS, S., WAN, X., AND SALTER, M. W. P2X4-Receptor-Mediated Synthesis and Release of Brain-Derived Neurotrophic Factor in Microglia Is Dependent on Calcium and p38-Mitogen-Activated Protein Kinase Activation. *Journal of Neuroscience* 29, 11 (2009), 3518--3528.
- [30] UMPIERRE, A. D., BYSTROM, L. L., YING, Y., LIU, Y. U., WORRELL, G., AND WU, L.-J. Microglial calcium signaling is attuned to neuronal activity in awake mice. *Elife* 9 (2020), e56502.
- [31] YOUNG, P., FERGUSON, C., BAÑUELOS, S., AND GAUTEL, M. Molecular structure of the sarcomeric Z-disk: two types of titin interactions lead to an asymmetrical sorting of  $\alpha$ -actinin. *The EMBO journal* 17, 6 (1998), 1614--1624.
- [32] ZAWADZKA, M., DABROWSKI, M., GOZDZ, A., SZADUJKIS, B., SLIWA, M., LIPKO, M., AND KAMINSKA, B. Early steps of microglial activation are directly affected by neuroprotectant FK506 in both in vitro inflammation and in rat model of stroke. *Journal of Molecular Medicine* 90, 12 (dec 2012), 1459--1471.
- [33] ZAWADZKA, M., DABROWSKI, M., GOZDZ, A., SZADUJKIS, B., SLIWA, M., LIPKO, M., AND KAMINSKA, B. Early steps of microglial activation are directly affected by neuroprotectant FK506 in both in vitro inflammation and in rat model of stroke. *Journal of Molecular Medicine* 90, 12 (dec 2012), 1459--1471.
